# Supplementary material for: The ATP-dependent chromatin remodeling enzyme CHD7 regulates pro-neural gene expression and neurogenesis in the inner ear
Source: Oxford University Press journal article supplement (doi:10.1242/dev.047894), 2010-08-24
Supplement: dev047894tables1.pdf [file dev047894tables1.pdf]

**Table S1. Quantitation of H3-positive cells in the *Ngn1*-positive domain**

| Genotype        | E9.5                       |                             | E10.5                      |                             |
|-----------------|----------------------------|-----------------------------|----------------------------|-----------------------------|
|                 | <i>Chd7</i> <sup>+/+</sup> | <i>Chd7</i> <sup>Gt/+</sup> | <i>Chd7</i> <sup>+/+</sup> | <i>Chd7</i> <sup>Gt/+</sup> |
| Mean            | 38                         | 23                          | 59                         | 33                          |
| s.e.m.          | 4                          | 3                           | 5                          | 3                           |
| <i>P</i>        | –                          | 0.01                        | –                          | 0.0005                      |
| <i>n</i> (ears) | 8                          | 8                           | 8                          | 8                           |
