# Supplementary material for: The ATP-dependent chromatin remodeling enzyme CHD7 regulates pro-neural gene expression and neurogenesis in the inner ear
Source: Oxford University Press journal article supplement (doi:10.1242/dev.047894), 2010-08-24
Supplement: dev047894tables2.pdf [file dev047894tables2.pdf]

**Table S2. Quantitation of TUNEL-positive cells**

| Genotype                                  | Epithelium                |                            |                             | Ganglion                  |                            |                             |
|-------------------------------------------|---------------------------|----------------------------|-----------------------------|---------------------------|----------------------------|-----------------------------|
|                                           | <i>Chd7<sup>+/+</sup></i> | <i>Chd7<sup>Gt/+</sup></i> | <i>Chd7<sup>Gt/Gt</sup></i> | <i>Chd7<sup>+/+</sup></i> | <i>Chd7<sup>Gt/+</sup></i> | <i>Chd7<sup>Gt/Gt</sup></i> |
| <b>E9.5 otic epithelium and ganglion</b>  |                           |                            |                             |                           |                            |                             |
| Mean                                      | 34                        | 45                         | 33                          | 57                        | 47                         | 8                           |
| s.e.m.                                    | 7                         | 9                          | 12                          | 10                        | 7                          | 3                           |
| <i>P</i>                                  | –                         | 0.3237                     | 0.9514                      | –                         | 0.4477                     | 0.0003                      |
| <i>n</i> (ears)                           | 8                         | 8                          | 8                           | 8                         | 8                          | 8                           |
| <b>E10.5 otic epithelium and ganglion</b> |                           |                            |                             |                           |                            |                             |
| Mean                                      | 51                        | 33                         | 46                          | 41                        | 32                         | 11                          |
| s.e.m.                                    | 8                         | 11                         | 9                           | 8                         | 7                          | 4                           |
| <i>P</i>                                  | –                         | 0.1994                     | 0.6969                      | –                         | 0.4283                     | 0.0038                      |
| <i>n</i> (ears)                           | 8                         | 8                          | 8                           | 8                         | 8                          | 8                           |
